# Supplementary material for: Training Plan for the Continuity of Non-Presential Education in Six Peruvian Universities during COVID-19
Source: MDPI journal article supplement (doi:10.3390/ijerph19031562), 2022-01-29
Supplement: s1 [file s1]

# TRAINING PLAN

## LIST OF PROGRAMMES AND COURSES

### BASIC COURSES (2 HOURS)

### TEACHERS AND MANAGERS

|                                                                                              |          |                |                       |
|----------------------------------------------------------------------------------------------|----------|----------------|-----------------------|
| What is distance learning supported by digital resources? What is e-learning?                | 1 VConf. | 14 sept. 8 h.  | Teachers and managers |
| How do I transform my face-to-face course into a distance/virtual course? General guidelines | 1 VConf. | 14 sept. 16 h. | Teachers and managers |
| Basic structure for my virtual course: How do I organise my course in the virtual space?     | 1 VConf. | 15 sept. 8 h.  | Teachers and managers |
| How to adapt what I have learnt to my subject/syllabus                                       | 1 VConf. | 15 sept. 16 h. | Teachers and managers |

### GENERAL COURSES (10 HOURS)

### TEACHERS AND MANAGERS

|                                                                                              |          |                               |                       |
|----------------------------------------------------------------------------------------------|----------|-------------------------------|-----------------------|
| Teaching models and methods in virtual environments                                          | 2 VConf. | 16 sept. 8h. / 22 sept. 16h.  | Teachers and managers |
| Design of basic teaching materials (other written materials, multimedia material).           | 2 VConf. | 16 sept. 16h. / 23 sept. 8h.  | Teachers and managers |
| Emphasis on the development of texts, didactic units - guides.                               | 2 VConf. | 17 sept. 8h. / 23 sept. 16h.  | Teachers and managers |
| Content design for virtual learning environments                                             | 2 VConf. | 17 sept. 16h. / 24 sept. 9h.  | Teachers and managers |
| Activities design and implementation in virtual environments                                 | 2 VConf. | 18 sept. 8h. / 24 sept. 16h.  | Teachers and managers |
| Production of audiovisual and multimedia resources                                           | 2 VConf. | 18 sept. 16h. / 25 sept. 8h.  | Teachers and managers |
| Communication tools in virtual spaces. The Forum, a key space for communication and feedback | 2 VConf. | 19 sept. 8h. / 25 sept. 16 h. | Teachers and managers |
| Collaboration tools in virtual spaces                                                        | 2 VConf. | 19 sept. 16h. / 26 sept. 9h.  | Teachers and managers |
| Accompaniment and monitoring tools in virtual spaces.                                        | 2 VConf. | 21 sept. 8h. / 26 sept. 16 h. | Teachers and managers |
| Evaluation of online learning. Process, techniques, and tools                                | 2 VConf. | 26 sept. 8h. / 28 sept. 15 h. | Teachers and managers |
| Tutor training in virtual environments. Tutoring as a didactic resource.                     | 2 VConf. | 22 sept. 8h. / 28 sept. 16 h. | Teachers and managers |

### SPECIFIC COURSES - PRACTICAL APPLICATION (15 HOURS)

### TEACHERS AND STUDENTS

#### Teaching models and methods in virtual environments

|            |          |                                           |          |
|------------|----------|-------------------------------------------|----------|
| Videoforum | 3 VConf. | 12 oct. 8h. / 19 oct. 9h. / 26 oct. 16 h. | Teachers |
|------------|----------|-------------------------------------------|----------|

|                                                                                                    |          |                                              |                       |
|----------------------------------------------------------------------------------------------------|----------|----------------------------------------------|-----------------------|
| Working through an image                                                                           | 3 VConf. | 5 oct. 8h. / 12 oct. 9h. / 21 oct. 8h.       | Teachers              |
| Going deeper into a topic                                                                          | 3 VConf. | 13 nov. 17 h. / 20 nov. 16 h. / 27 nov. 16h. | Teachers              |
| Case study                                                                                         | 3 VConf. | 19 oct. 8h. / 26 oct. 9h. / 2 nov. 16 h.     | Teachers              |
| Project work                                                                                       | 3 VConf. | 28 sept. 8 h. / 5 oct. 9h. / 12 oct. 16 h.   | Teachers              |
| Flipped Classroom                                                                                  | 3 VConf. | 21 sept. 9h. / 28 sept. 9h. / 5 oct. 16 h.   | Teachers              |
| Design of basic teaching materials                                                                 |          |                                              | Teachers              |
| Teaching guides                                                                                    | 3 VConf. | 22 sept. 9h. / 29 sept. 9h. / 6 oct. 16h.    | Teachers              |
| Study material-textbook                                                                            | 3 VConf. | 29 sept. 8h. / 6 oct. 15h. / 13 oct. 16h.    | Teachers              |
| Designing content for virtual learning environments:<br>Resources used                             |          |                                              |                       |
| Presentations: PPT, Powtoon, Genially, Prezi, Canva, Emaze                                         | 3 VConf. | 30 sept. 8h. / 7 oct. 9 h. / 14 oct. 16 h.   | Teachers and students |
| Infographics: Genially, Piktochart, Canva, Infogram, Easel.ly, Visme                               | 3 VConf. | 4 nov. 8h. / 11 nov. 9 h. / 18 nov. 8h.      | Teachers and students |
| Interactive images: Genially, Justapose, Visme, Thinglink                                          | 3 VConf. | 23 sept. 9 h. / 30 sept. 9h. / 7 oct. 16h.   | Teachers and students |
| Concept Maps: Mindomo, Glosster, Creately, Coogle, Mindmanager, Mindmap, Cmap Tools, Free Mind Map | 3 VConf. | 14 oct. 8h. / 21 oct. 9h. / 28 oct. 16 h.    | Teachers and students |
| Interactive content: H5P, Apester, Kahoot, Quizlet                                                 | 3 VConf. | 11 nov. 8h. / 18 nov. 9h. / 25 nov. 8h.      | Teachers and students |
| Blogs (Moodle), Blogger                                                                            | 3 VConf. | 7 oct. 17 h. / 13 oct. 15h. / 21 oct. 16h.   | Teachers and students |
| Timelines: Timeline, Sutori, iSpring, OiceTimelin, Visme                                           | 3 VConf. | 28 oct. 8h. / 4 nov. 9h. / 11 nov. 16 h.     | Teachers and students |
| Audiovisual and multimedia resources production                                                    |          |                                              | Teachers and students |
| Videotutoriales: Jing, Screencast-o-matic, Apowersoft, Ctrl+Alt+G, Vídeos en el FORO de Moodle     | 3 VConf. | 15 oct. 8h. / 22 oct. 9h. / 29 oct. 16 h.    | Teachers and students |
| Animated videos: Moovly, Weebly                                                                    | 3 VConf. | 8 oct. 8h. / 15 oct. 9h. / 22 oct. 16 h.     | Teachers and students |
| Youtube channels: crear, subir, editar                                                             | 3 VConf. | 22 oct. 8h. / 29 oct. 9h. / 5 nov. 16h.      | Teachers and students |
| Video editing: Camtasia, OBS Studio                                                                | 3 VConf. | 24 sept. 15 h. / 1 oct. 9 h. / 8 oct. 16h.   | Teachers and students |
| Podcasts                                                                                           | 3 VConf. | 1 oct. 8h. / 8 oct. 9h. / 15 oct. 16h.       | Teachers and students |
| Interactive whiteboards: Webpaint y Jamboard                                                       | 3 VConf. | 29 oct. 8h. / 5 nov. 9h. / 12 nov. 16h.      | Teachers              |
| Virtual labs                                                                                       |          |                                              |                       |
| FisQuiweb, PhET, Educaplus, Go-Lab                                                                 | 3 VConf. | 6 oct. 17 h. / 13 oct. 9 h. / 20 oct. 16h.   | Teachers              |
| Design and implementation of activities in virtual environments                                    |          |                                              |                       |
| Activities related to learning objects-moodle                                                      | 3 VConf. | 13 oct. 8h. / 20 oct. 9h. / 27 oct. 16h.     | Teachers              |
| Activities related to learning objects-open resources                                              | 3 VConf. | 20 oct. 8h. / 27 oct. 9h. / 3 nov. 16h.      | Teachers              |
| Communication tools in virtual environments                                                        |          |                                              |                       |
| Forums                                                                                             | 3 VConf. | 25 sept. 15 h. / 2 oct. 9 h. / 9 oct 16 h.   | Teachers              |
| Chats                                                                                              | 3 VConf. | 2 oct. 16 h. / 9 oct. 15 h. / 16 oct 16 h.   | Teachers              |
| E-mail                                                                                             | 3 VConf. | 9 oct. 8h. / 16 oct. 9h. / 23 oct. 16 h.     | Teachers              |
| Videoconferencing: Zoom, Meet, Teams, Skype, ...                                                   | 3 VConf. | 16 oct. 8h. / 23 oct. 9h. / 30 oct. 16 h.    | Teachers              |
| WhatsApp                                                                                           | 3 VConf. | 23 oct. 8h. / 30 oct. 9 h. / 6 nov. 9h.      | Teachers              |
| Collaboration tools in virtual environments                                                        |          |                                              |                       |
| Wikis                                                                                              | 3 VConf. | 3 oct. 9 h. / 10 oct. 9 h. / 17 oct. 16 h.   | Teachers              |
| Glossaries                                                                                         | 3 VConf. | 10 oct. 8 h. / 17 oct. 9h. / 24 oct. 16h.    | Teachers              |
| Portfolios                                                                                         | 3 VConf. | 26 sept. 10 h. / 3 oct. 9h. / 10 oct. 16h.   | Teachers              |
| Google Drive                                                                                       | 3 VConf. | 7 nov. 8h. / 14 nov. 9h. / 21 nov. 8h.       | Teachers              |

|                                                          |          |                                           |          |
|----------------------------------------------------------|----------|-------------------------------------------|----------|
| One Drive                                                | 3 VConf. | 24 oct. 8h. / 31 oct. 9 h. / 7 nov. 16h.  | Teachers |
| Dropbox                                                  | 3 VConf. | 17 oct. 8h. / 24 oct. 9h. / 31 oct. 16h.  | Teachers |
| Bibliographic management tools: Mendeley, Refworks       | 3 VConf. | 31 oct. 8h. / 7 nov. 9h. / 14 nov. 16 h.  | Teachers |
| Tools for accompaniment and monitoring in virtual spaces |          |                                           |          |
| Mentoring, interaction tools                             | 3 VConf. | 2 nov. 8h. / 9 nov. 9h. / 16 nov. 8h.     | Teachers |
| Feedback                                                 | 3 VConf. | 9 nov. 8h. / 16 nov. 9h. / 23 nov. 16 h.  | Teachers |
| Rúbricas                                                 | 3 VConf. | 26 oct. 8h. / 2 nov. 9h. / 9 nov. 16 h.   | Teachers |
| Activity reports                                         | 3 VConf. | 5 nov. 8h. / 12 nov. 9h. / 19 nov. 8h.    | Teachers |
| Evaluation in virtual spaces                             |          |                                           |          |
| Moodle features-. Questionnaires, surveys...             | 3 VConf. | 30 oct. 16 h. / 6 nov. 9h. / 13 nov. 16h. | Teachers |
| Google forms, Office 365,...                             | 3 VConf. | 27 oct. 8h. / 3 nov. 9h. / 10 nov. 16 h.  | Teachers |
| Tools for academic integrity                             |          |                                           |          |
| Turnitin                                                 | 3 VConf. | 19 nov. 8h. / 17 nov. 9h. / 24 nov. 8h.   | Teachers |
| Proctoring                                               | 3 VConf. | 3 nov. 8h. / 10 nov. 9h. / 17 nov. 8h.    | Teachers |
| Gradescope                                               | 3 VConf. | 6 nov. 8h. / 13 nov. 9h. / 20 nov. 8h.    | Teachers |
| Alternative assessments                                  | 3 VConf. | 12 nov. 8h. / 19 nov. 9h. / 26 nov. 8h.   | Teachers |

## SYNCHRONOUS OPEN COURSES (2 HOURS)

## STUDENTS

### Induction courses

2 Editions. Weeks 14 to 19 and 21 to 25 September. It will be possible to do any of the two

|                                                                                                  |          |                                 |          |
|--------------------------------------------------------------------------------------------------|----------|---------------------------------|----------|
| What does the student need to know about your university?                                        | 1 VConf. | 14 sept. 8 h. / 21 sept. 8h.    | Students |
| What does distance learning supported by digital resources consist of? What is virtual learning? | 1 VConf. | 14 sept. 16 h. / 21 sept. 16 h. | Students |
| What tools and resources do you need to master in order to learn in a virtual environment?       | 1 VConf. | 15 sept. 8 h. / 22 sept 8 h.    | Students |
| Zero courses: skills levelling                                                                   | 1 VConf. | 15 sept. 16 h. / 22 sept 16 h.  | Students |

### Course at the beginning of the course

2 Editions. Weeks 14 to 19 and 21 to 25 September. It will be possible to do any of the two

|                                                   |          |                                 |          |
|---------------------------------------------------|----------|---------------------------------|----------|
| Immersion and understanding my virtual classroom  | 1 VConf. | 16 sept. 8 h. / 23 sept. 16h.   | Students |
| Time management and planning                      | 1 VConf. | 16 sept. 16 h. / 23 sept. 17 h. | Students |
| Tips for accessing my synchronous sessions        | 1 VConf. | 17 sept. 8 h. / 24 sept.. 16h.  | Students |
| Tips for making the most of asynchronous sessions | 1 VConf. | 17 sept. 16 h. / 24 sept. 17 h. | Students |

### Specific courses - practical application (15 hours)

|                                                |          |                                    |          |
|------------------------------------------------|----------|------------------------------------|----------|
| Word processing: How to get the most out of it | 3 VConf. | 18 sept. / 25 sept. / 02 oct. 8h.  | Students |
| Spreadsheets                                   | 3 VConf. | 18 sept. / 25 sept. / 02 oct. 17h. | Students |
| Audiovisual presentations                      | 3 VConf. | 18 sept. / 25 sept. / 02 oct. 16 h | Students |

## FOLLOW-UP AND MONITORING PROTOCOLS COURSES

## TECHNICAL SUPPORT STAFF

### General courses (10 hours)

|                                                              |          |                            |                     |
|--------------------------------------------------------------|----------|----------------------------|---------------------|
| Case management via ticketing tool                           | 2 VConf. | 14 sept. / 21 sept. / 10h. | Support technicians |
| Remote assistance support                                    | 2 VConf. | 15 sept. / 22 sept. / 10h. | Support technicians |
| Consolidation of frequently asked questions on the help desk | 2 VConf. | 16 sept. / 23 sept. / 10h. | Support technicians |
| Analytics Reporting - Videoconferencing systems              | 2 VConf. | 17 sept. / 24 sept. / 10h. | Support technicians |

### Specific courses - practical application (15 hours)

|                                                                       |          |                                       |                     |
|-----------------------------------------------------------------------|----------|---------------------------------------|---------------------|
| Moodle for Administrators: Configuring the Moodle platform            | 2 VConf. | 14 sept. / 21 sept. / 15h.            | Support technicians |
| Moodle for Administrators: Backup backups                             | 2 VConf. | 14 sept. / 21 sept. / 18h.            | Support technicians |
| Moodle for Administrators: Moodle and course migration                | 2 VConf. | 15 sept. / 22 sept. / 15h.            | Support technicians |
| Moodle for Administrators: Plugins                                    | 2 VConf. | 16 sept. / 23 sept. / 15h.            | Support technicians |
| Moodle for Administrators: Content Management (repository management) | 2 VConf. | 17 sept. / 24 sept. / 15h.            | Support technicians |
| Moodle for Administrators: Analytics Reporting                        | 2 VConf. | 18 sept. / 25 sept. / 15h.            | Support technicians |
| User support and development of instructional materials               | 2 VConf. | 18 sept. / 25 sept. / 28 sept. / 10h. | Support technicians |
