# Supplementary material for: Training Plan for the Continuity of Non-Presential Education in Six Peruvian Universities during COVID-19
Source: MDPI journal article supplement (doi:10.3390/ijerph19031562), 2022-01-29
Supplement: s1 [file s1]

**Table S1.** Needs identified by dimension to address non-presential education.

| Dimension      | Identified needs                                                               | Development           |
|----------------|--------------------------------------------------------------------------------|-----------------------|
| Organisational | Internal regulations, appropriate education policy                             | 100% b                |
|                | Organisational units of administrative functioning                             | 100% b                |
|                | Adapted educational model                                                      | 83% b – 17% a         |
|                | Course monitoring and evaluation system or instrument                          | 100% b                |
|                | Academic and technological innovation                                          | 67% a – 33% b         |
| Technological  | Training and capacity building programmes for institutional teams              | 100% b                |
|                | Connectivity and features                                                      | 50% a – 50% b         |
|                | Access to institutional technology equipment                                   | 50% a – 50% b         |
|                | Teaching-learning platform (existence and management)                          | 83% b – 17% c         |
|                | Digital tools and licences for non-classroom education                         | 67% b – 33% a         |
|                | Virtual libraries                                                              | 83% b – 17% a         |
|                | Virtual laboratories                                                           | 100% a                |
|                | Remote technical assistance                                                    | 100% b                |
| Competence     | Equipment installation, maintenance, and repair                                | 67% c – 33% b         |
|                | Knowledge and practice of distance learning.                                   | 67% b – 33% c         |
|                | Management of virtual Teaching-Learning environments, platforms, and resources | 83% a – 17% b         |
|                | Organisation and appropriate use of online documentation                       | 33% a – 17% b – 50% c |
|                | Use of simulation materials and tasks                                          | 33% a – 67% b         |
|                | Use of LMS and digital tools                                                   | 17% a – 50% b – 33% c |
|                | Creation of materials and activities for virtual courses.                      | 33% a – 67% b         |
|                | Design and development of online assessment processes                          | 50% a – 50% b         |
|                | Adequate knowledge of pedagogy and didactics applied to virtual environments.  | 17% a – 83% b         |
|                | Course virtualisation                                                          | 50% a – 50% b         |
|                | Monitoring and evaluation of non-classroom courses.                            | 17% a – 83% b         |
|                | Efficient use of digital media                                                 | 83% b – 17% c         |
|                | Knowledge of non-face-to-face education processes                              | 17% a/67% b – 17% c   |
|                | Self-management in non-classroom-based teaching-learning processes             | 50% a – 50% b         |
|                | Collaborative work in non-face-to-face environments                            | 50% a – 50% b         |
|                | Capacity for institutional academic and pedagogical management                 | 17% a – 50% b – 33% c |
|                | Capacity for institutional planning, monitoring and evaluation                 | 50% b – 50% c         |
|                | Management strategies and instruments                                          | 50% a – 50% c         |
|                | Computer systems, hardware, and software management                            | 33% b – 67% c         |

*Note.* Needs identified as a percentage based on the number of universities showing this need. Universities involved: 6. Levels observed: a. Lowest development level. Highest need; b. Medium development level. Need for improvement; c. Highest development level. Need for deepening and specialisation.
